# Supplementary material for: How measurement noise limits the accuracy of brain-behaviour predictions
Source: Springer Nature journal article supplement (doi:10.1038/s41467-024-54022-6), 2024-12-12
Supplement: MOESM1 [file 41467_2024_54022_MOESM1_ESM.pdf]

# Supplementary Results

## Prediction accuracy for age prediction - additional metrics

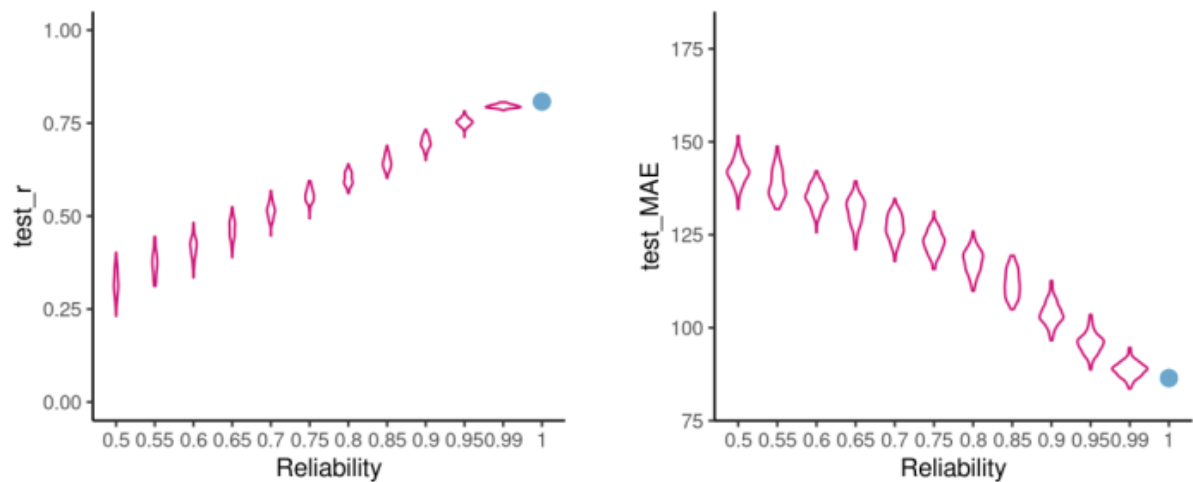

**Supplementary Figure 1.** Mean absolute error (MAE) and correlation between observed and predicted targets in age prediction. Each violin plot summarises the accuracy of predicting 100 simulated datasets within each reliability band.

## Sensitivity analyses - Age prediction

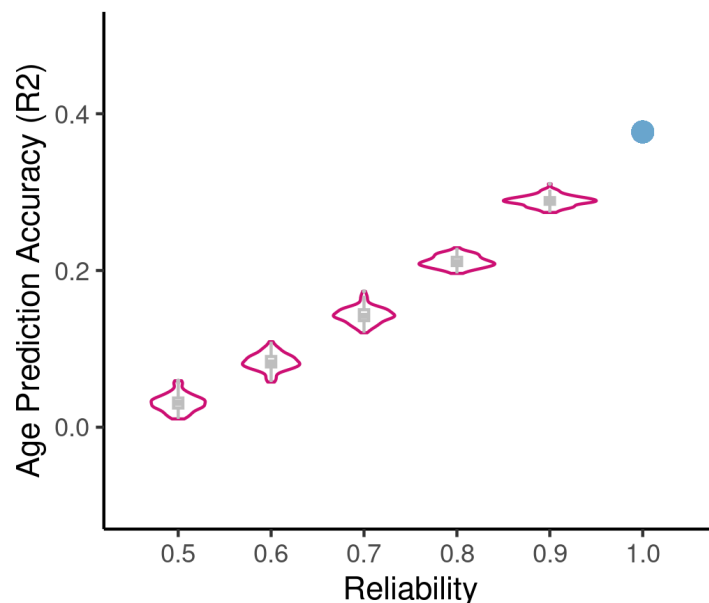

**Supplementary Figure 2.** Prediction of age using 5000 subjects from the UKB. The same sample of participants was used to create this figure as in the section "Behavioural reliability

is related to prediction accuracy” of the results. The age of subjects was predicted using ridge regression as in Figure 1 and accuracy was evaluated using R2. Each violin plot summarises the accuracy of predicting 100 simulated datasets within each reliability band. Boxplots are centred at the median, with the bounds representing the interquartile range, and whiskers the min/max values, outliers are not shown.

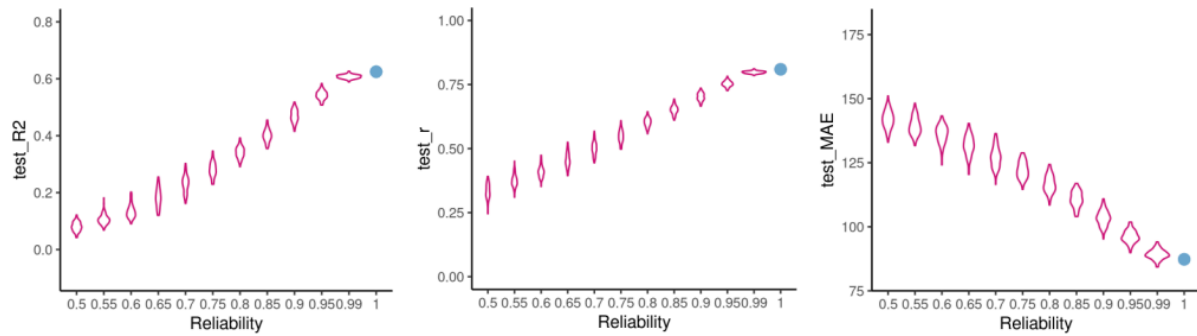

**Supplementary Figure 3.** Prediction Using Seitzman et al. (2020) Nodes. R2, Mean absolute error (MAE) and correlation between observed and predicted targets in age prediction using 300 nodes by Seitzmann et al. 2020. Each violin plot summarises the accuracy of predicting 100 simulated datasets within each reliability band.

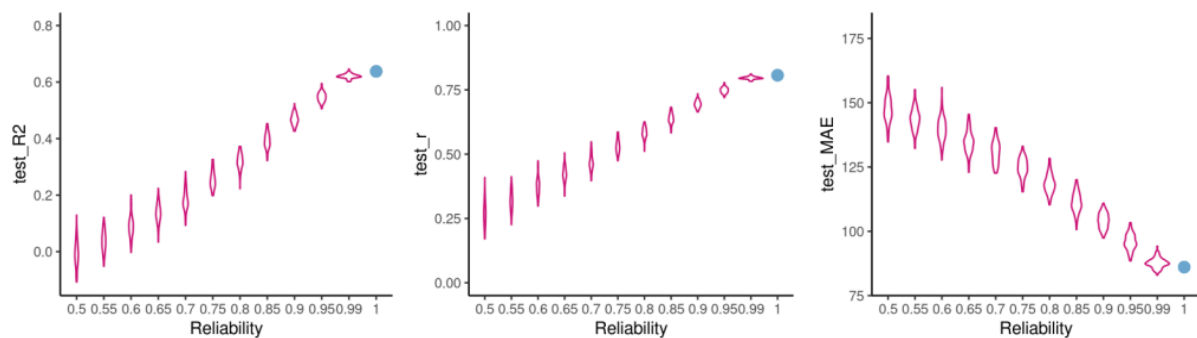

**Supplementary Figure 4.** Prediction Using Support Vector Regression. R2, Mean absolute error (MAE) and correlation between observed and predicted targets in replication of age prediction using support vector regression. Each violin plot summarises the accuracy of predicting 100 simulated datasets within each reliability band.

## Impact of reliability on prediction accuracy in the HCP-A dataset - influence of connectivity reliability

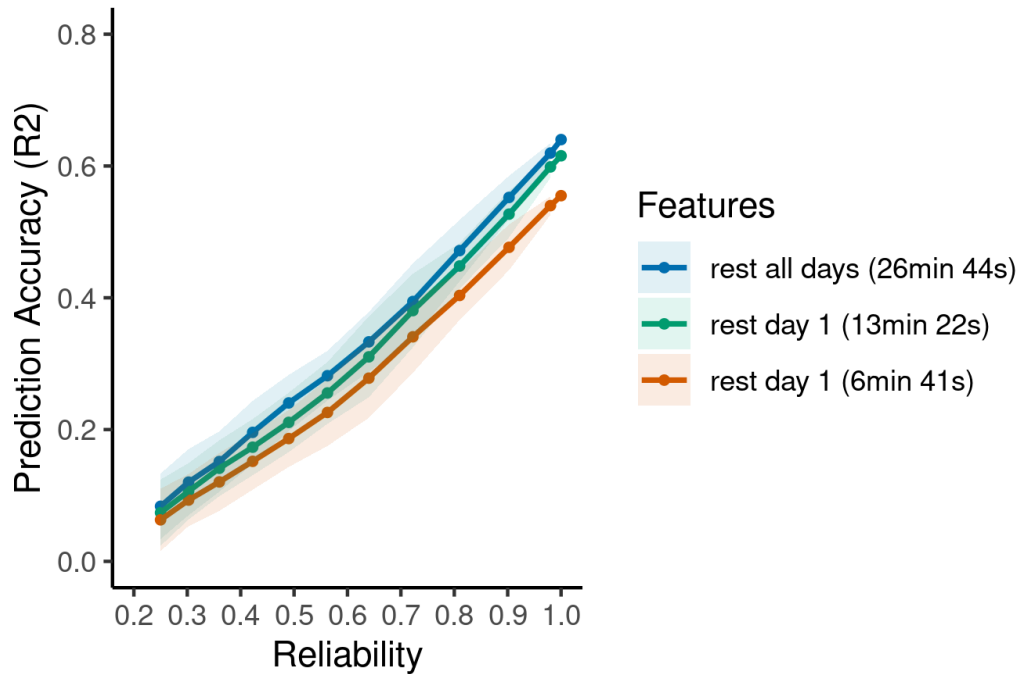

**Supplementary Figure 5.** Influence of feature reliability (functional connectivity) on the prediction of age with decreasing reliability. The x-axis represents the reliability of age, starting with empirically measured age at ICC  $\approx 1.0$ , followed by age with reduced reliability through simulations as in the main text. Feature reliability (represented by colours) was manipulated by reducing the amount of rsfMRI time course used to calculate functional connectivity, from the average of all four sessions collected on both days used in all main analyses to an average of 13 minutes collected on the first day only and finally, connectivity calculated from a single 6 minutes session collected on the first day in the anterior-to-posterior direction (same as only session in the UKB). Solid lines represent the mean prediction accuracy across all 100 simulated datasets in each reliability band, shaded areas represent 2 standard deviations in prediction accuracies.

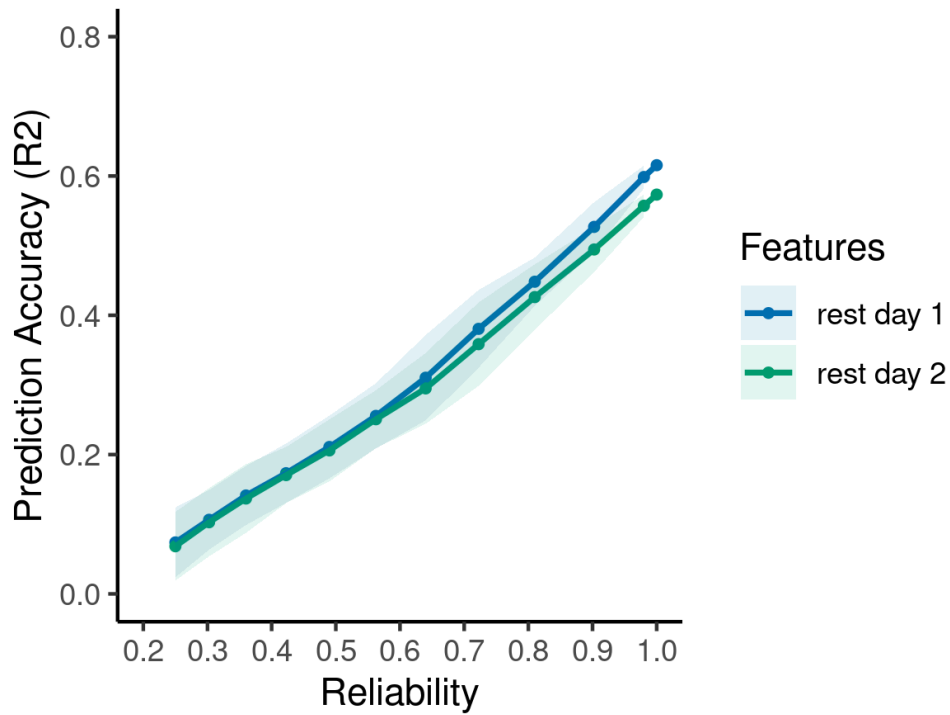

**Supplementary Figure 6.** Influence of feature reliability (functional connectivity) on the prediction of age with decreasing reliability. The x-axis represents the reliability of age, starting with empirically measured age at ICC  $\approx 1.0$ , followed by age with reduced reliability through simulations as in the main text. Age prediction from functional connectivity was calculated on day 1 and 2 rsfMRI acquisition separately. Both days had 13 minutes and 22 seconds of data. Solid lines represent the mean prediction accuracy across all 100 simulated datasets in each reliability band, shaded areas represent 2 standard deviations in prediction accuracies.

## Sensitivity analyses - prediction of behaviour

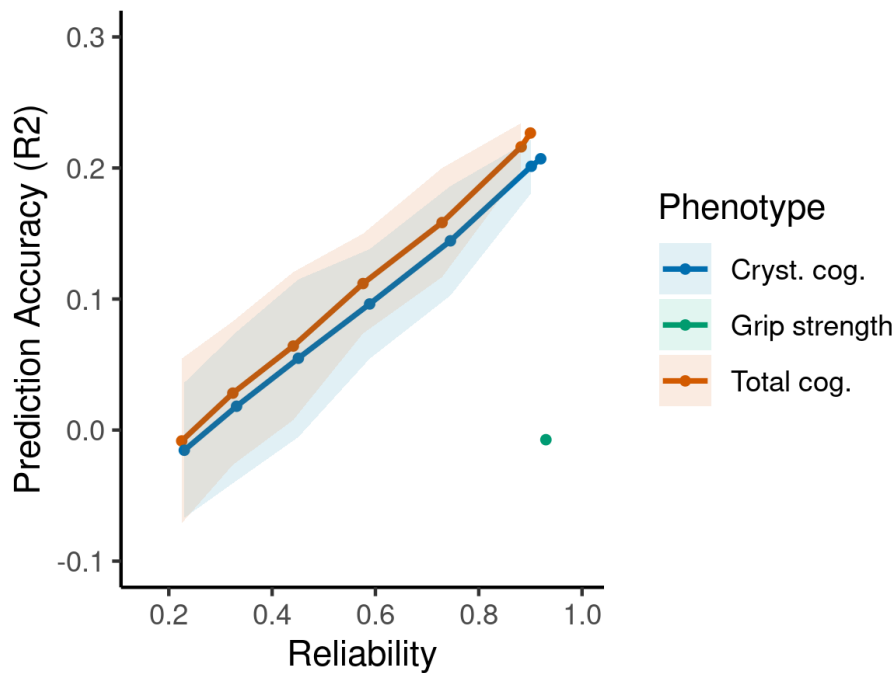

**Supplementary Figure 7.** Prediction of selected phenotypes with feature-wise confound (age, sex) regression. Grip strength could not be predicted when confounds were regressed. Solid lines represent the mean prediction accuracy across all 100 simulated datasets in each reliability band, shaded areas represent 2 standard deviations in prediction accuracies.

## Sensitivity analyses - Total cognition

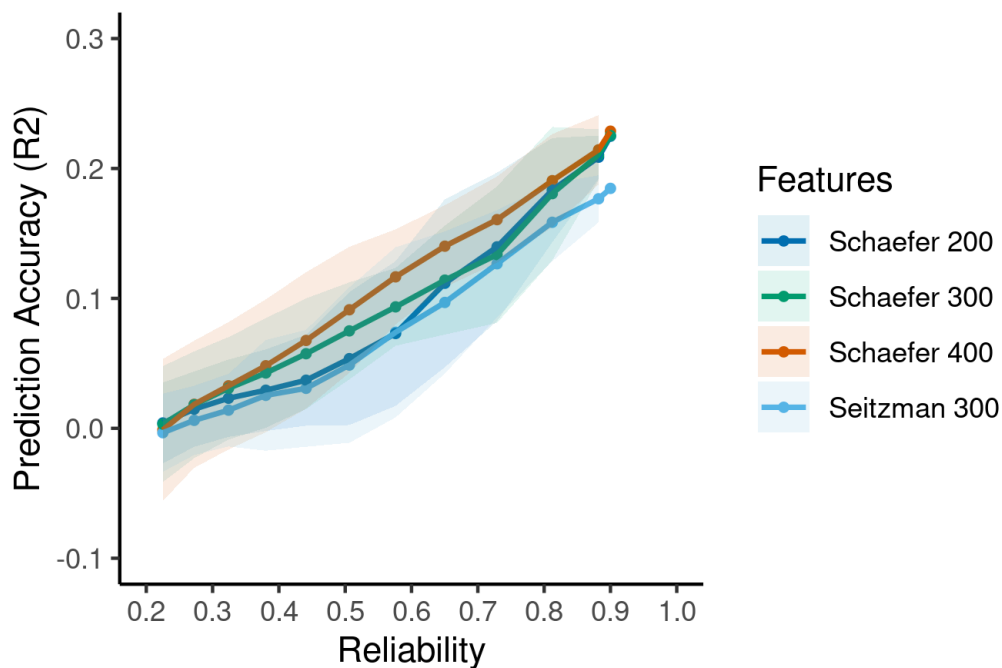

**Supplementary Figure 8.** Influence of feature granularity on prediction of total cognition with decreasing reliability. Solid lines represent the mean prediction accuracy across all 100 simulated datasets in each reliability band, shaded areas represent 2 standard deviations in prediction accuracies.

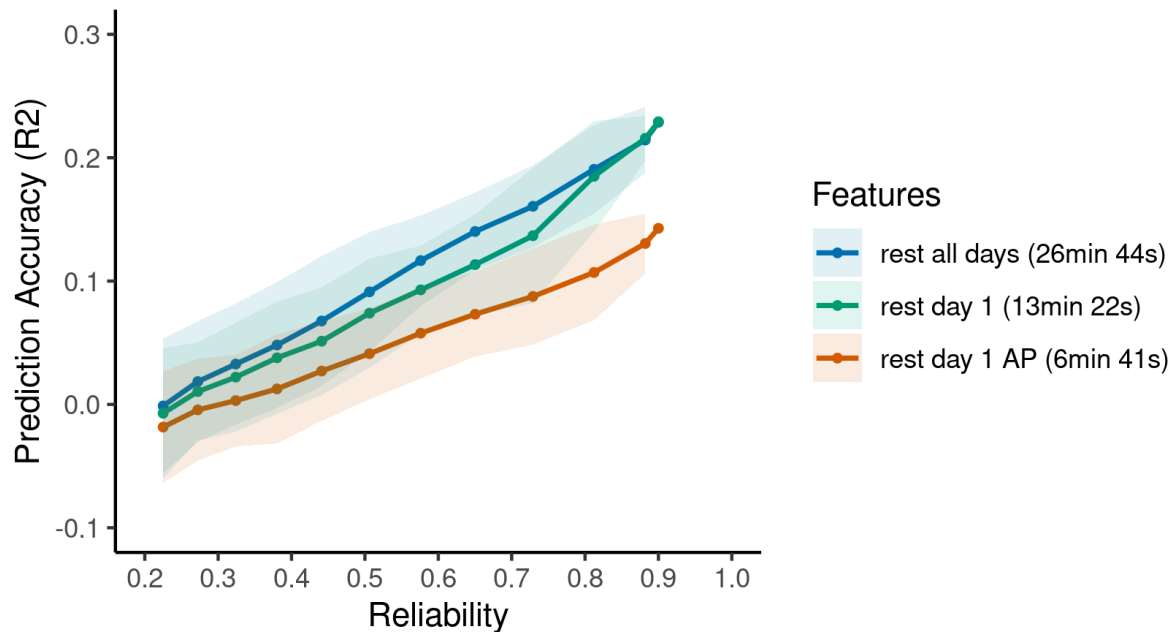

**Supplementary Figure 9.** Influence of feature reliability (functional connectivity) on prediction of total cognition with decreasing reliability. The x-axis represents the reliability of the NIH Toolbox total cognition composite score, starting at ICC = 0.9 based on Heaton et al. (2014), followed by total cognition with reduced reliability through simulations as in the main text. Feature reliability (represented by colours) was manipulated by reducing the amount of rsfMRI time course used to calculate functional connectivity, from the average of all four sessions collected on both days used in all main analyses to an average of 13 minutes collected on the first day only and finally, connectivity calculated from a single 6-minute session collected on the first day in the anterior-to-posterior direction (same as only session in the UKB). Solid lines represent the mean prediction accuracy across all 100 simulated datasets in each reliability band, shaded areas represent 2 standard deviations in prediction accuracies.

## Phenotype prediction supplementary figures

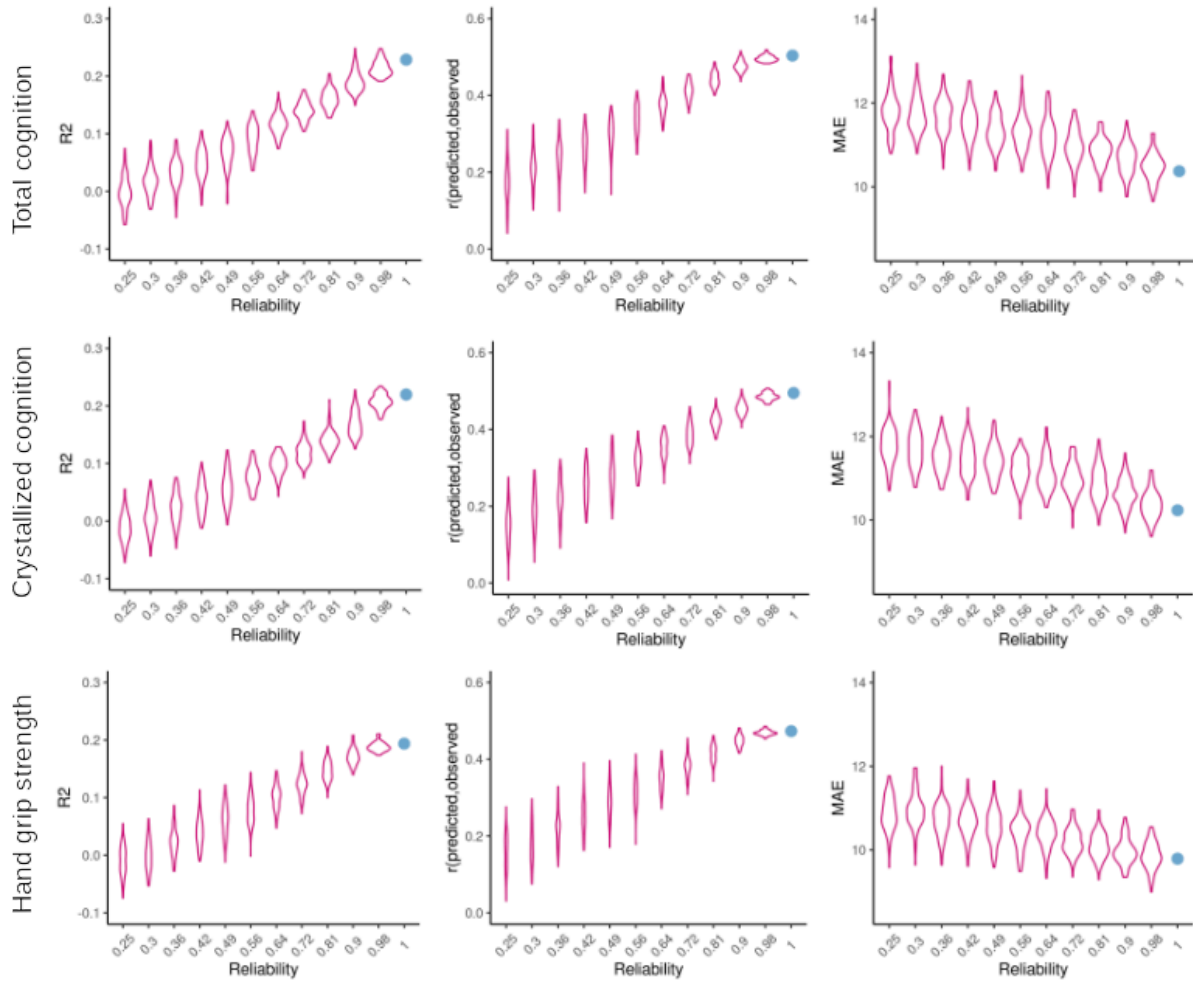

**Supplementary Figure 10.** R2, Mean absolute error (MAE) and correlation between observed and predicted targets for each target behaviours separately. Each violin plot summarises the accuracy of predicting 100 simulated datasets within each reliability band.

## Uncorrected results for Figure 1

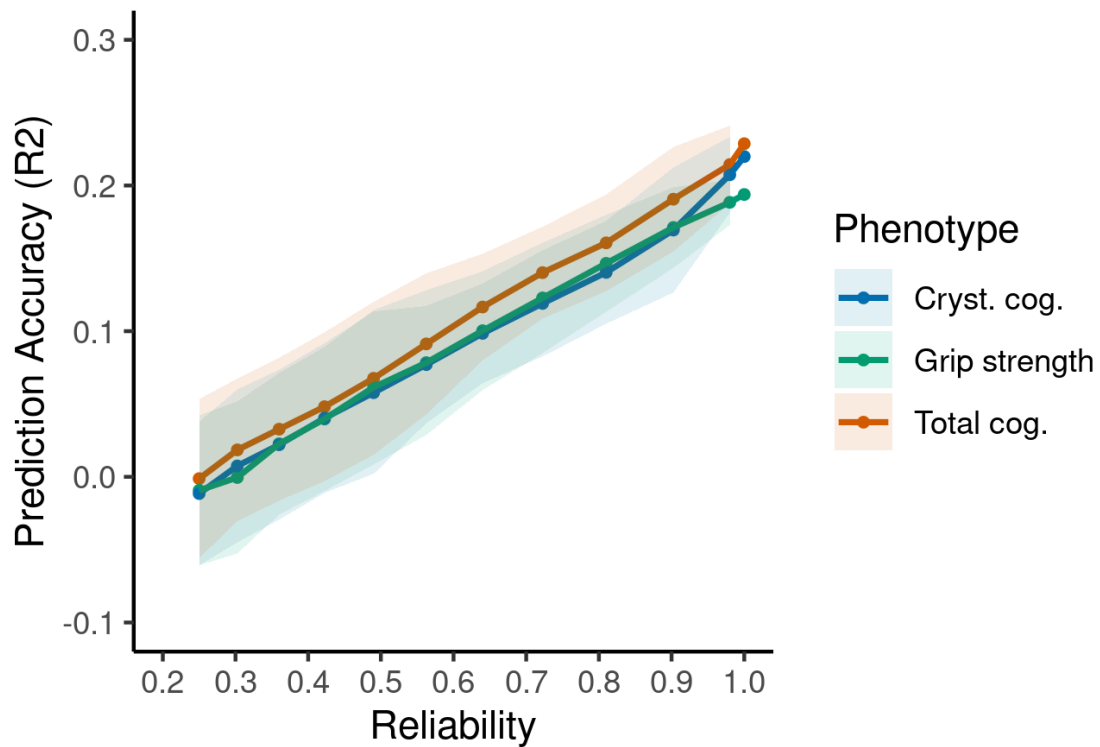

**Supplementary Figure 11.** Impact of reducing the correlation between original and simulated target scores (reflecting reduced reliability) on accuracy in prediction of total cognition composite score, crystallised cognition composite score and grip strength. Solid lines represent the mean across all 100 simulated datasets in each correlation band, shaded areas represent 2 standard deviations in prediction accuracies.



## HCP young adult dataset predicted behaviours and respective reliability

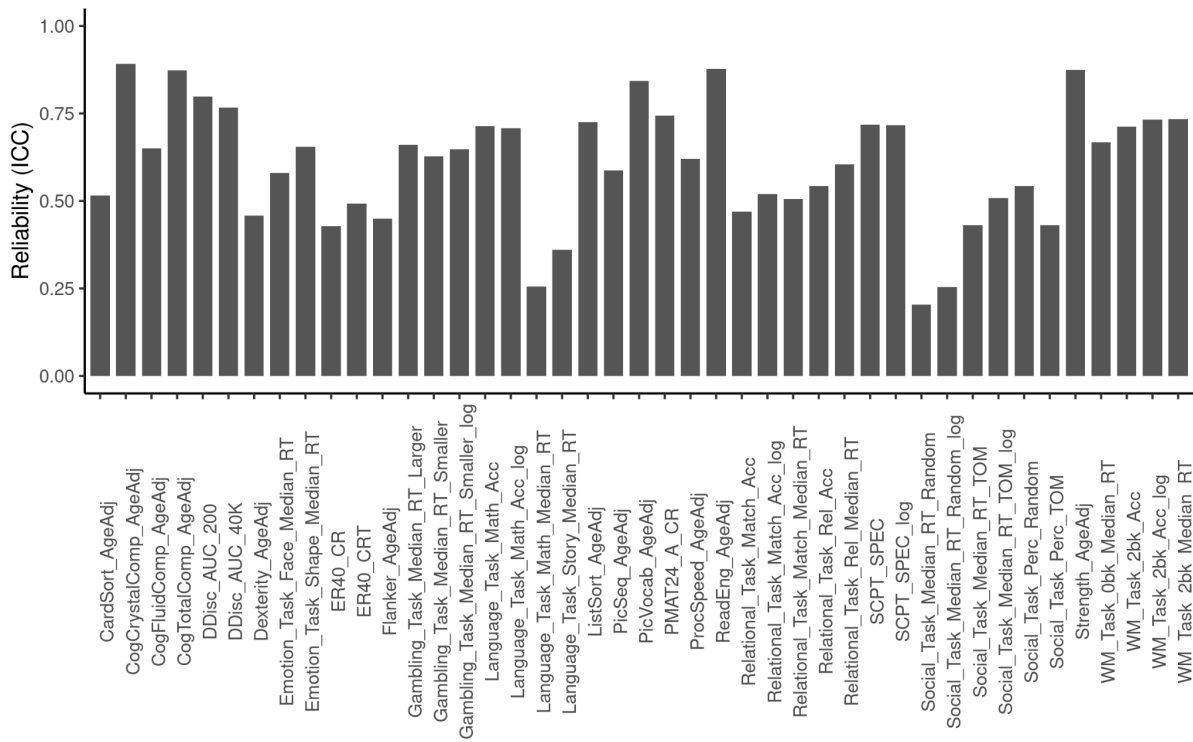

**Supplementary Figure 12.** Reliability of all behaviours predicted in the HCP-YA dataset

## UKB predicted behaviours and respective reliability

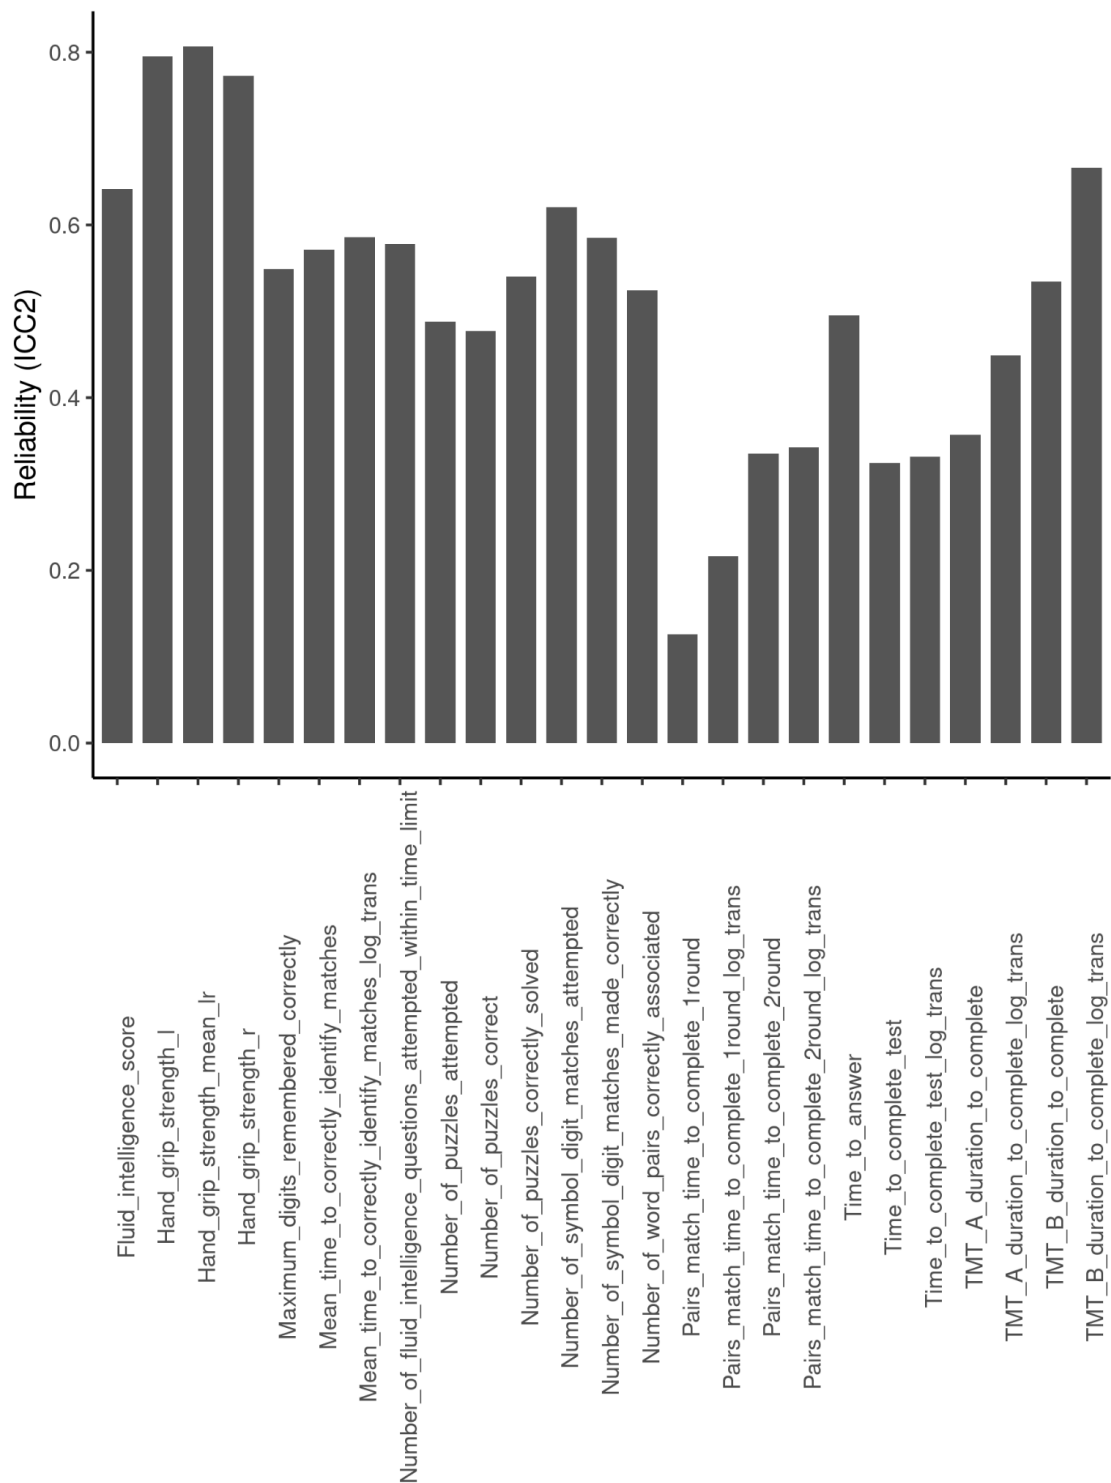

**Supplementary Figure 13.** Reliability of all behaviours predicted in the UKB dataset

## Association between prediction accuracy and reliability in the ABCD dataset

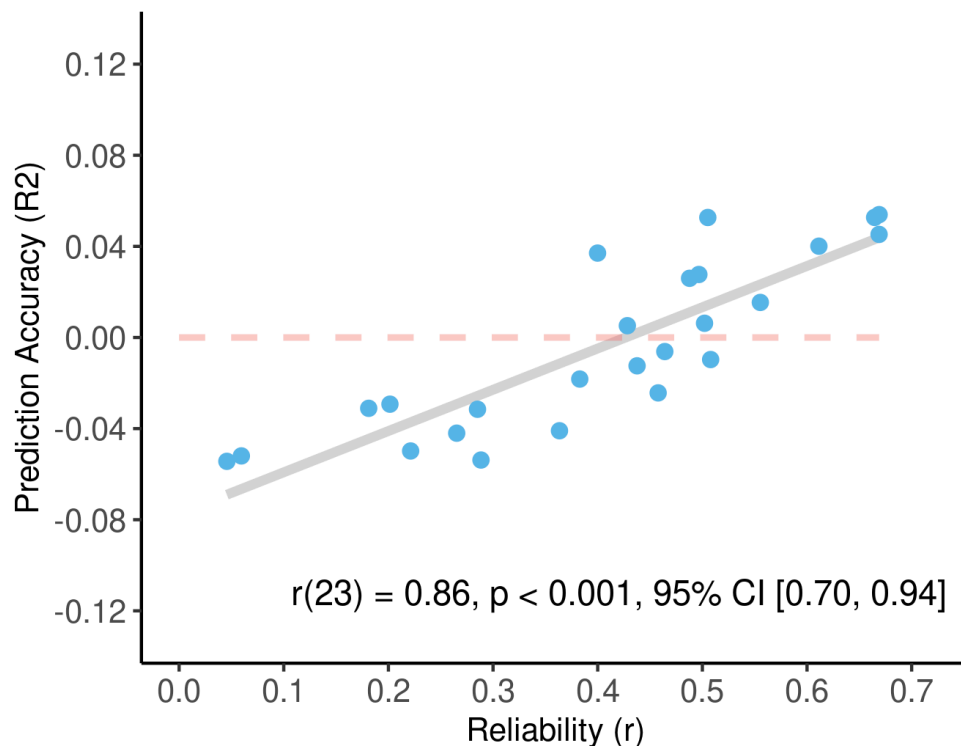

**Supplementary Figure 14.** Association between reliability and prediction accuracy. Each data point represents one of 25 behavioural assessments in the ABCD. As measurements were collected from participants aged 9-10 at baseline and 11-12 at follow-up (mean retest interval = 23 months), reliability is calculated with test-retest (Pearson) correlation and not ICC. In developmental contexts, unlike ICC, correlation is robust to systematic age-related changes as it is not penalised by differences in means between baseline and follow-up data and different development rates across participants.

# Prediction of cognitive flexibility measured trail-making task in UKB

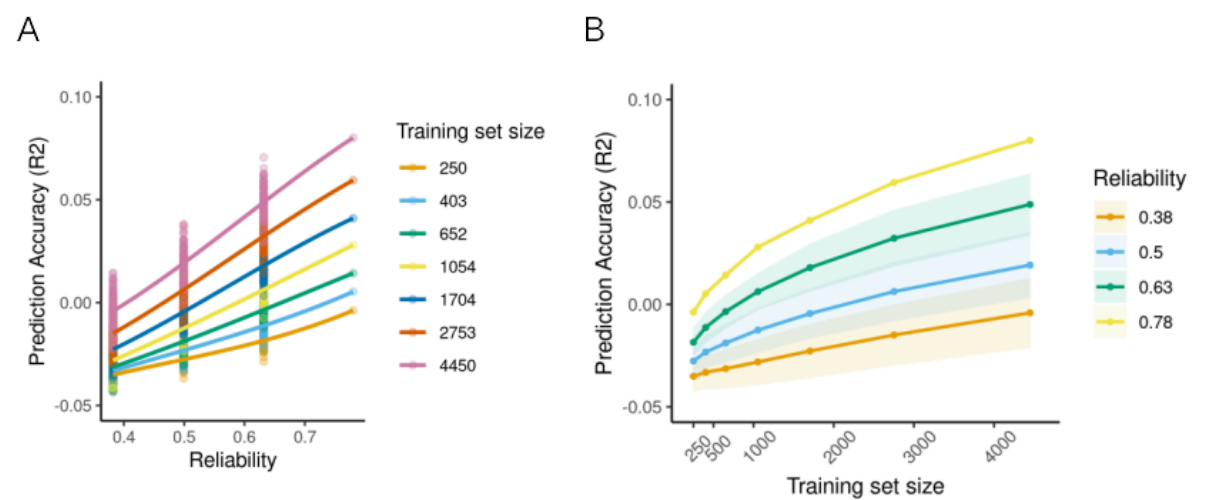

**Supplementary Figure 15.** Prediction and subsampling in UKB. (A) Impact of training set size on original and simulated cognitive flexibility with reduced reliability. Panel (B) Impact of training set size on prediction accuracy in empirical and simulated data with varying levels of reliability. Solid lines represent the mean across all 100 simulated datasets in each correlation band and shaded areas represent 2 standard deviations in prediction accuracies. Results were fitted with an exponential function for illustration purposes and adjusted for the TMT task's reliability (ICC = 0.775) estimated in independent data by Fawns-Ritchie et al. (2020).

## Learning curve results for empirical behaviours

**Supplementary Table 1**

*Prediction accuracy (R2) of empirical behaviours across varying training set sizes*

| Behaviour                     | Training Set Size |        |        |       |       |       |       |
|-------------------------------|-------------------|--------|--------|-------|-------|-------|-------|
|                               | 250               | 403    | 652    | 1054  | 1704  | 2753  | 4450  |
| Fluid Intelligence            | -0.02             | -0.014 | -0.006 | 0.004 | 0.008 | 0.018 | 0.029 |
| Associative Learning (SDST)   | -0.001            | 0.009  | 0.02   | 0.033 | 0.043 | 0.056 | 0.068 |
| Cognitive Flexibility (TMT B) | -0.002            | 0.007  | 0.0198 | 0.03  | 0.042 | 0.056 | 0.069 |
| Hand Grip Strength (mean)     | 0.127             | 0.16   | 0.197  | 0.24  | 0.279 | 0.313 | 0.344 |
| Age                           | 0.107             | 0.149  | 0.189  | 0.228 | 0.272 | 0.316 | 0.354 |

## Improvement in prediction accuracy with increased training set size

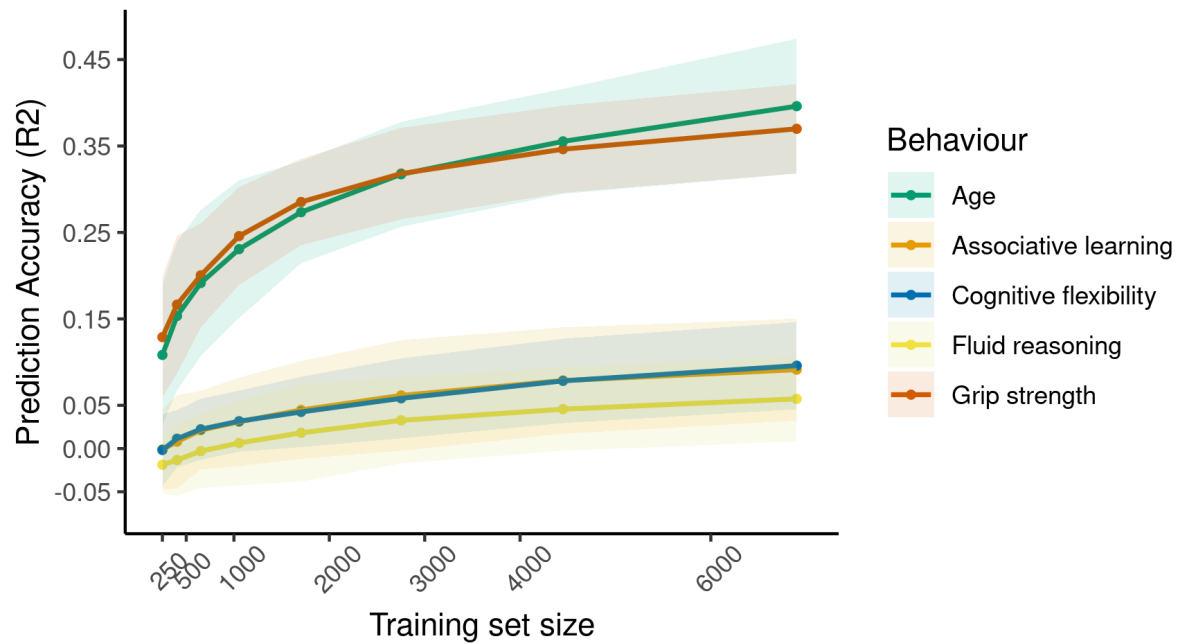

**Supplementary Figure 16.** Impact of training set size on prediction accuracy of empirical behaviours. Solid lines represent the mean accuracy across 100 subsamples and shaded areas represent 2 standard deviations in prediction accuracy. Abbreviations: SDST, Symbol Digit Substitution Test; TMT-B, Trail making task part B.

## Distribution of test-retest correlations across HCP-YA, UK and ABCD datasets

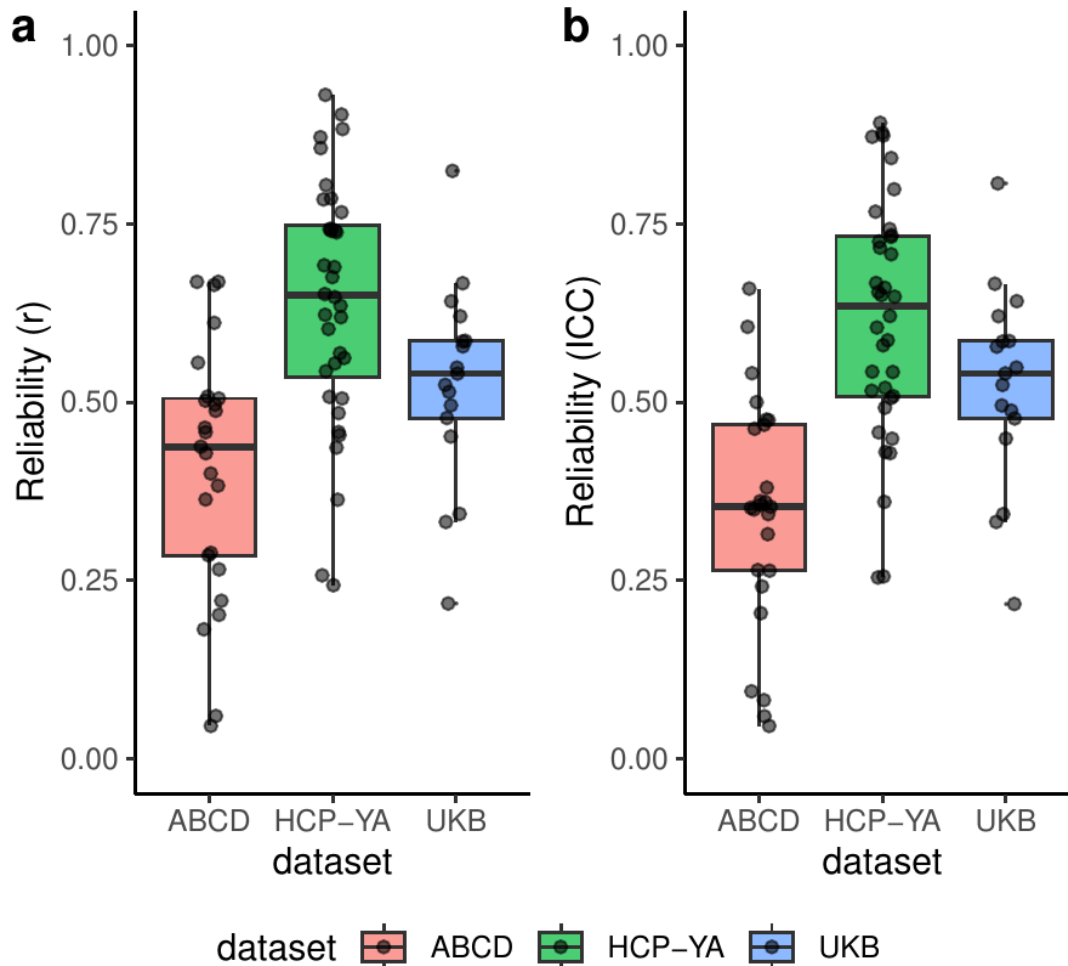

**Supplementary Figure 17.** Boxplots of test-retest correlations (A) and ICC (B) of all measures used for assessing the association between prediction accuracy and reliability in Figure 2 of the main text. Overall median for test-retest correlations = 0.55; and ICC = 0.51. Both retest correlations and ICC are displayed as for some datasets, such as the ABCD, test-retest correlations may be more appropriate as systematic error coming from different rates of development across participants is not penalised.

## Improvement in reliability and prediction accuracy with averaging across repeated assessments in grip strength

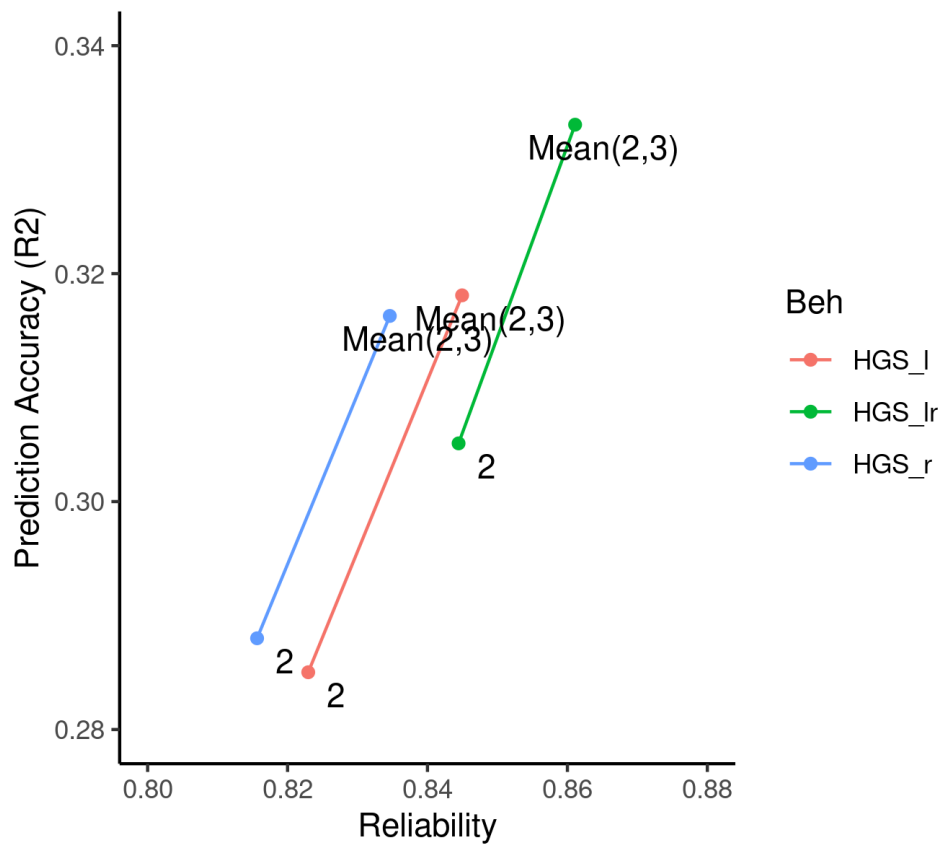

**Supplementary Figure 18.** Impact of increasing reliability by averaging in UKB hand grip strength prediction. Numbers denote UKB time points. Neuroimaging was collected at time point 2. Grip strength was averaged over time points 2 (neuroimaging baseline) and 3 (neuroimaging follow-up) to maximise the number of subjects. Reliability was calculated as Pearson test-retest correlation between time point 0 (baseline) and time point 2 as well as the average of 2 and 3. HGS\_lr stands for the average of measurement over left and right hands. Abbreviations; HGS: Hand grip strength.

# Supplementary methods

## Comparison of acquisition and preprocessing parameters across datasets

**Supplementary Table 2**

*Acquisition and preprocessing of datasets*

| Parameter                      | Dataset                                                        |                                                                |                                       |
|--------------------------------|----------------------------------------------------------------|----------------------------------------------------------------|---------------------------------------|
|                                | HCP-A                                                          | HCP-YA                                                         | UKB                                   |
| Scanner                        | Siemens Prisma 3T                                              | Siemens 'Connectom Skyra' 3T                                   | Siemens Skyra 3T                      |
| Resting-state sessions         | 4 runs across 2 days with AP and PA phase encoding on each day | 4 runs across 2 days with LR and RL phase encoding on each day | a single run acquired in AP direction |
| acquisition time               | 488 frames per run (26 min total)                              | 1200 frames per run (58 min total)                             | 490 volumes (6 min)                   |
| TR/TE                          | 800/37 ms                                                      | 720/33 ms                                                      | 735/39 ms                             |
| Acquisition sites              | 4                                                              | 1                                                              | 4                                     |
| gradient distortion correction | yes                                                            | yes                                                            | yes                                   |
| intensity normalisation        | yes                                                            | yes                                                            | yes                                   |
| motion correction              | yes                                                            | yes                                                            | yes                                   |
| normalisation to MNI           | yes                                                            | yes                                                            | yes                                   |
| artefact removal               | ICA-FIX                                                        | ICA-FIX                                                        | ICA-FIX                               |
| temporal filtering             | bandpass filtered at 0.01 – 0.1 Hz                             | bandpass filtered at 0.01 – 0.1 Hz                             | highpass filtering                    |
| denoising                      | WM+CSF+GS regression                                           | WM+CSF+GS regression                                           | no                                    |

*Abbreviations; AP: anterior-to-posterior; PA: posterior-to-anterior; LR: left-to-right; RL right-to-left all refer to phase encoding directions*



## The exact sample size for predicted behaviours in HCP-A

**Supplementary Table 3**

*Description of sample for behavioural prediction in HCP A*

| Behaviour                             | Sample (Female) | Ages  |
|---------------------------------------|-----------------|-------|
| Age (in months)                       | 647 (351)       | 36-86 |
| Total cognition (age-adjusted)        | 550 (308)       | 36-86 |
| Crystallised cognition (age-adjusted) | 549 (308)       | 36-86 |
| Hand grip strength (dominant hand)    | 551 (306)       | 36-86 |

## Behaviours selected for prediction in HCP-YA dataset

**Supplementary Table 4**

*Predicted behaviours in HCP-YA*

| Behaviour        |
|------------------|
| PicSeq_AgeAdj    |
| CardSort_AgeAdj  |
| Flanker_AgeAdj   |
| PMAT24_A_CR      |
| ReadEng_AgeAdj   |
| PicVocab_AgeAdj  |
| ProcSpeed_AgeAdj |
| DDisc_AUC_200    |
| DDisc_AUC_40K    |
| ListSort_AgeAdj  |
| SCPT_SPEC        |

CogFluidComp\_AgeAdj  
CogTotalComp\_AgeAdj  
CogCrystalComp\_AgeAdj  
ER40\_CR  
ER40\_CRT  
Strength\_AgeAdj  
Dexterity\_AgeAdj  
WM\_Task\_2bk\_Acc  
WM\_Task\_2bk\_Median\_RT  
WM\_Task\_0bk\_Median\_RT  
Language\_Task\_Math\_Acc  
Language\_Task\_Math\_Median\_RT  
Language\_Task\_Story\_Median\_RT  
Social\_Task\_Perc\_Random  
Social\_Task\_Perc\_TOM  
Social\_Task\_Median\_RT\_Random  
Social\_Task\_Median\_RT\_TOM  
Relational\_Task\_Match\_Acc  
Relational\_Task\_Match\_Median\_RT  
Relational\_Task\_Rel\_Acc  
Relational\_Task\_Rel\_Median\_RT  
Emotion\_Task\_Face\_Median\_RT  
Emotion\_Task\_Shape\_Median\_RT  
Gambling\_Task\_Median\_RT\_Larger  
Gambling\_Task\_Median\_RT\_Smaller

---

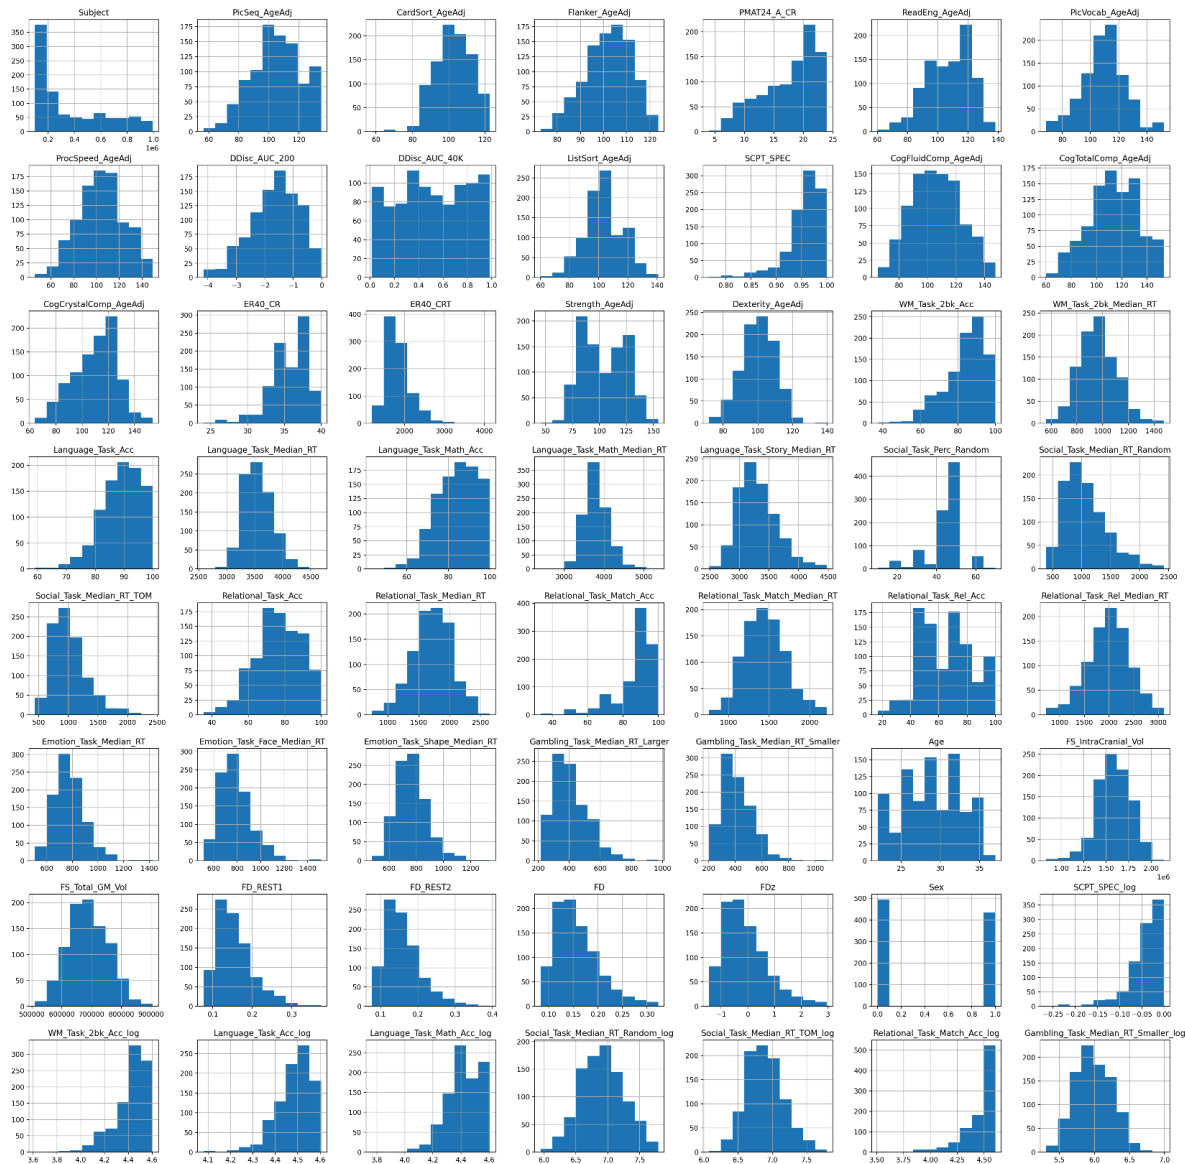

**Supplementary Figure 19.** Distribution of all predicted behaviours HCP-YA

## Excluded fields for UKB sample

This section details excluded and included fields when parsing UKB subjects. Subjects with a history of neurological disease, as reported in (Kweon et al., 2022) and additionally subjects with sleep apnoea were excluded.

### Supplementary Table 5

#### *Excluded fields in UKB participants*

|                                             |                                                                                                                                                                                                                                                                                                                                                                                                                                                                                                                                                                                                                                                                                                                                 |
|---------------------------------------------|---------------------------------------------------------------------------------------------------------------------------------------------------------------------------------------------------------------------------------------------------------------------------------------------------------------------------------------------------------------------------------------------------------------------------------------------------------------------------------------------------------------------------------------------------------------------------------------------------------------------------------------------------------------------------------------------------------------------------------|
| Excluded ICD codes:                         | 'G473', 'F00', 'F01', 'F02', 'F03', 'G30', 'G20',<br>, 'G21', 'G23', 'G31', 'G32', 'G610', 'G35',<br>, 'G37', 'I63', 'G463', 'G464', 'I64', 'I694',<br>, 'C70', 'C71', 'D33', 'I60', 'I61', 'I62', 'I691',<br>, 'I692', 'I693', 'G060', 'G07', 'I671', 'Q282',<br>, 'Q283', 'G80', 'A521', 'A504', 'I64', 'A83',<br>, 'A86', 'B011', 'B020', 'B262', 'A85', 'B004',<br>, 'B582', 'A84', 'B050', 'B941', 'G04', 'A321',<br>, 'G05', 'G40', 'F803', 'S07', 'T040', 'A80',<br>, 'A81', 'A82', 'A83', 'A84', 'A85', 'A86', 'A87',<br>, 'A88', 'A89', 'G45', 'C70', 'C793', 'D32',<br>, 'D33', 'G03', 'A170', 'A171', 'A203', 'G01',<br>, 'G02', 'G00', 'G07', 'G122', 'Q05', 'Q760',<br>, 'P100', 'I60', 'S066', 'P103', 'G45', 'F' |
| Self-reported illness code (Data-Coding 6): | 1123, 1263, 1262, 1258, 1256, 1261, 1397,<br>1081, 1032, 1491, 1245, 1425, 1433, 1246,<br>1264, 1266, 1244, 1583, 1031, 1659, 1247,<br>1259, 1240, 1524, 1083, 1086, 1082                                                                                                                                                                                                                                                                                                                                                                                                                                                                                                                                                       |

## Behaviours selected for prediction in UKB dataset

### Supplementary Table 6

#### *Predicted behaviours in UKB*

| Behaviour                                  | Data-field |
|--------------------------------------------|------------|
| Pairs_match_time_to_complete_1st_round-2.0 | 400        |
| Pairs_match_time_to_complete_2nd_round-2.0 | 400        |
| Maximum_digits_remembered_correctly-2.0    | 4282       |
| Time_to_complete_test-2.0                  | 4285       |
| Time_to_answer-2.0                         | 4288       |
| TMT_A_duration_to_complete-2.0             | 6348       |

|                                                                        |        |
|------------------------------------------------------------------------|--------|
| TMT_B_duration_to_complete-2.0                                         | 6350   |
| Number_of_puzzles_correctly_solved-2.0                                 | 21004  |
| Number_of_puzzles_attempted-2.0                                        | 6383   |
| Fluid_intelligence_score-2.0                                           | 20016  |
| Mean_time_to_correctly_identify_matches-2.0                            | 20023  |
| Number_of_fluid_intelligence_questions_attempted_within_time_limit-2.0 | 20128  |
| Number_of_word_pairs_correctly_associated-2.0                          | 20197  |
| Number_of_puzzles_correct-2.0                                          | 6373   |
| Number_of_symbol_digit_matches_attempted-2.0                           | 23323  |
| Number_of_symbol_digit_matches_made_correctly-2.0                      | 23324  |
| Hand_grip_strength_mean_lr-2.0*                                        | 46, 47 |

---

\*Average of Hand\_grip\_strength\_l-2.0 and Hand\_grip\_strength\_r-2.0

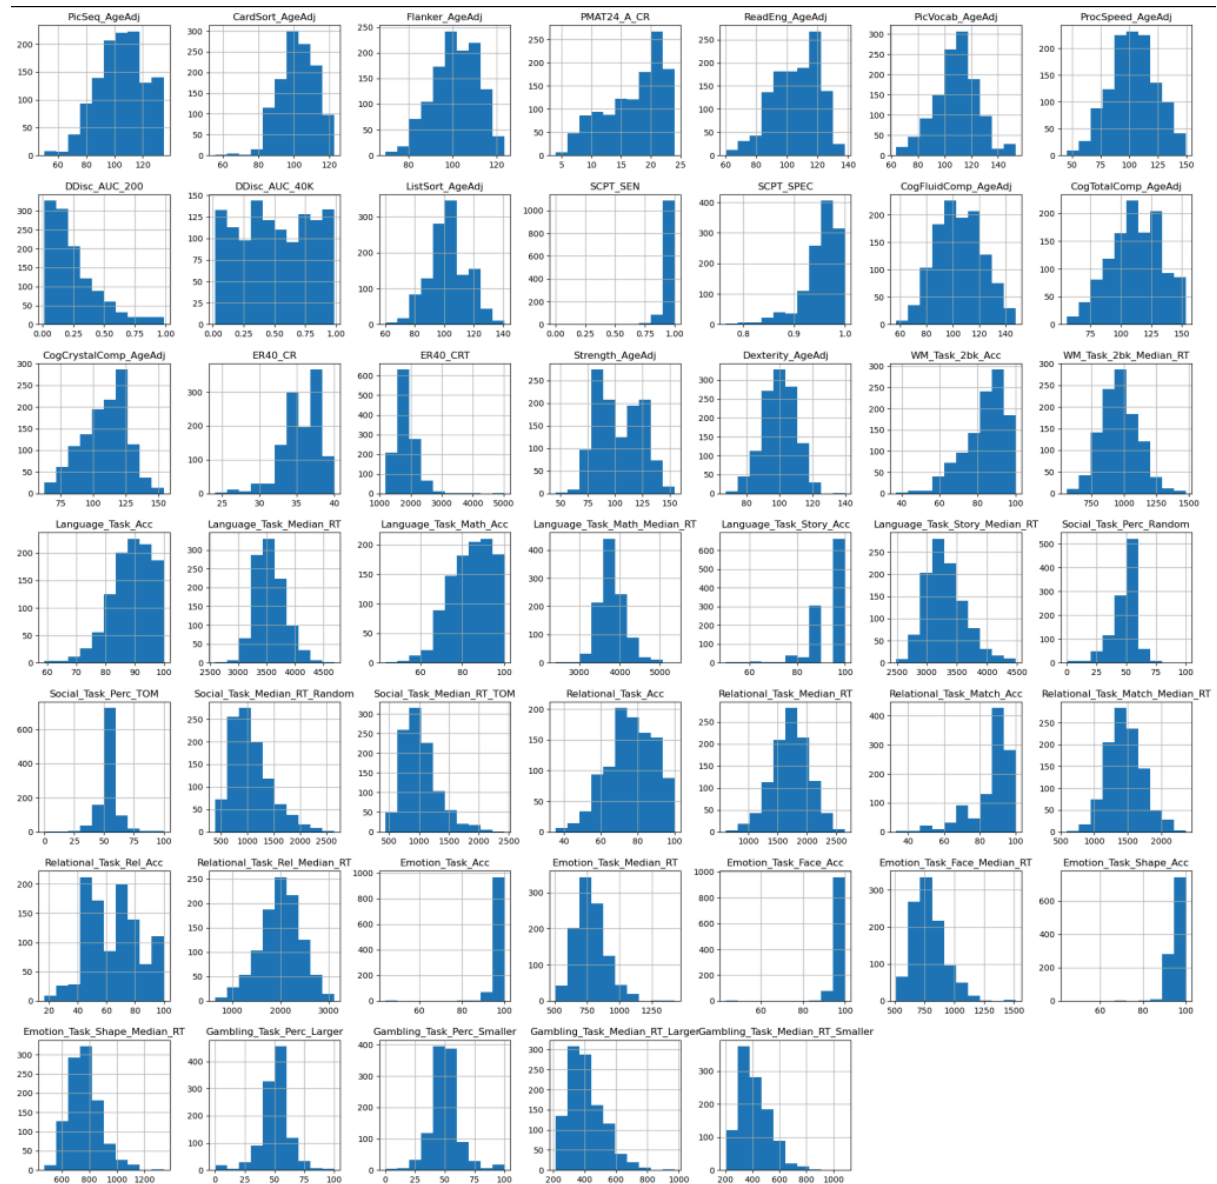

**Supplementary Figure 20.** Distribution of all predicted behaviours in UKB

## Behaviours selected for prediction in ABCD

**Supplementary Table 7**

*Predicted behaviours in ABCD*

Behaviour

nihtbx\_picvocab\_fc

nihtbx\_flanker\_fc

nihtbx\_pattern\_fc  
nihtbx\_picture\_fc  
nihtbx\_reading\_fc  
nihtbx\_cryst\_fc  
pea\_ravlt\_sd\_trial\_vi\_tc  
pea\_ravlt\_ld\_trial\_vii\_tc  
lmt\_scr\_perc\_correct  
lmt\_scr\_perc\_wrong  
lmt\_scr\_avg\_rt  
lmt\_scr\_rt\_correct  
tfmri\_mid\_all\_beh\_srwpfb\_nt  
tfmri\_mid\_all\_beh\_lrwpfb\_mrt  
tfmri\_mid\_all\_beh\_srwpfb\_mrt  
tfmri\_mid\_all\_beh\_lrwpfb\_nt  
tfmri\_sst\_all\_beh\_total\_mssrt  
tfmri\_nb\_all\_beh\_c2b\_rate  
tfmri\_nb\_all\_beh\_c2b\_mrt  
tfmri\_nb\_all\_beh\_c0b\_rate  
tfmri\_nb\_all\_beh\_c0b\_mrt  
tfmri\_rec\_all\_beh\_place\_dp  
tfmri\_rec\_all\_beh\_negf\_dp  
tfmri\_rec\_all\_beh\_neutf\_dp  
tfmri\_rec\_all\_beh\_posf\_dpr

---

## Comparison of accuracy to computation time

Given the large number of predictions that were necessary to conduct for our simulation analyses, we first tested algorithms commonly used in the literature (Supplementary Figure

3) to find the best computation time to accuracy trade-off (measured with R2). This was not meant as an exhaustive comparison to identify the perfect pipeline. Four algorithms were tested: linear ridge regression, kernel ridge regression and two flavours of support vector regression all implemented in the Scikit learn library [version 0.24.2, (Pedregosa et al., 2011)]. A 10-fold cross-validation scheme was used to evaluate the performance of all models. Hyperparameter optimisation of the alpha regularisation parameter for ridge regression and kernel ridge regression was performed using a nested cross-validation scheme (5-fold cross-validation for kernel ridge and leave-one-out cross-validation for ridge regression) embedded with the 10-fold cross-validation. Next, two implementations of linear support vector regression were tested (sklearn.svm.LinearSVR with squared epsilon-insensitive (L2) loss function and sklearn.svm.SVR; see [https://github.com/MartinGell/Prediction\\_Reliability](https://github.com/MartinGell/Prediction_Reliability) for details). A heuristic was used to efficiently calculate the hyperparameter C (Helleputte, Paul, & Gramme, 2021):

$$c = \frac{1}{\frac{1}{n} \sum_{i=1}^n \sqrt{G[i,i]}}$$
 where G = matrix multiplication of features and transpose of features (here functional connectivity).

Prior to training, subjects with behavioural data over  $\pm 3SD$  were removed and neuroimaging features were z-scored within participants (average connectomes from HCP dataset were first transformed back to r values from Fisher-z scores) to keep features consistent across algorithms as this step was required for kernel ridge regression. Within each training fold, neuroimaging features were z-scored across participants before models were trained (using Sklearn's `pipeline`).

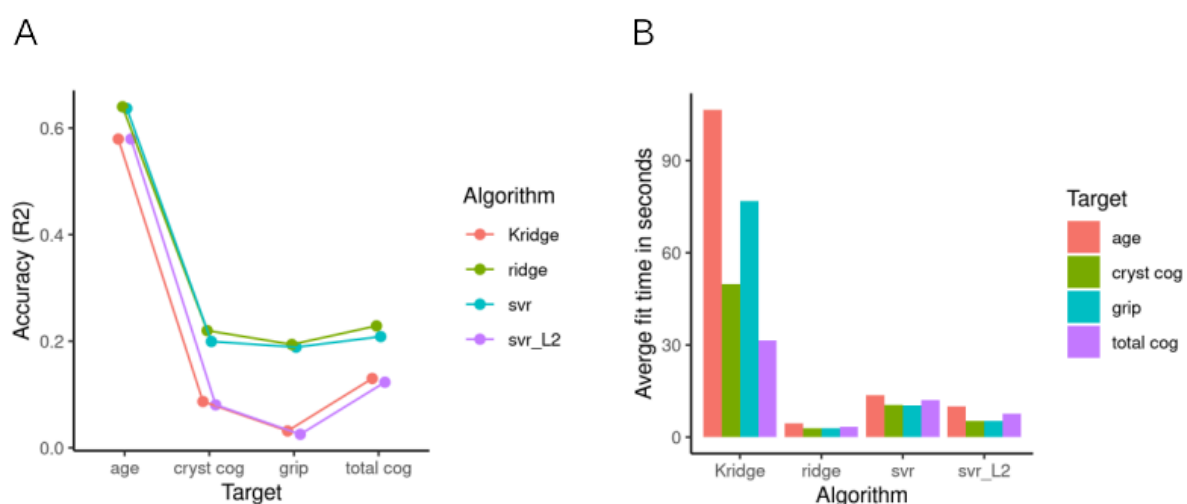

**Supplementary Figure 21. Comparison of algorithms.** (A) Displays prediction accuracy (R2) for all behaviours of interest predicted using different algorithms: Kridge = Kernel ridge regression, ridge = Linear ridge regression, svr = Support vector regression and svr\_L2 =



support vector regression. (B) Displays the average training time of a single mode across cross-validation for all tested behaviours and algorithms.

## References

Helleputte, T., Paul, J., & Gramme, P. (2021). *LiblineaR*. Retrieved from

<https://search.r-project.org/CRAN/refmans/LiblineaR/html/heuristicC.html>

Kweon, H., Aydogan, G., Dagher, A., Bzdok, D., Ruff, C. C., Nave, G., ... Koellinger, P. D.

(2022). Human brain anatomy reflects separable genetic and environmental

components of socioeconomic status. *Science Advances*, 8(20), eabm2923. doi:

10.1126/sciadv.abm2923

Pedregosa, F., Varoquaux, G., Gramfort, A., Michel, V., Thirion, B., Grisel, O., ... Duchesnay,

É. (2011). Scikit-learn: Machine Learning in Python. *The Journal of Machine Learning*

*Research*, 12(null), 2825–2830.
